# Supplementary material
Source: MDPI journal article supplement (https://www.mdpi.com/2306-5729/11/1/3)

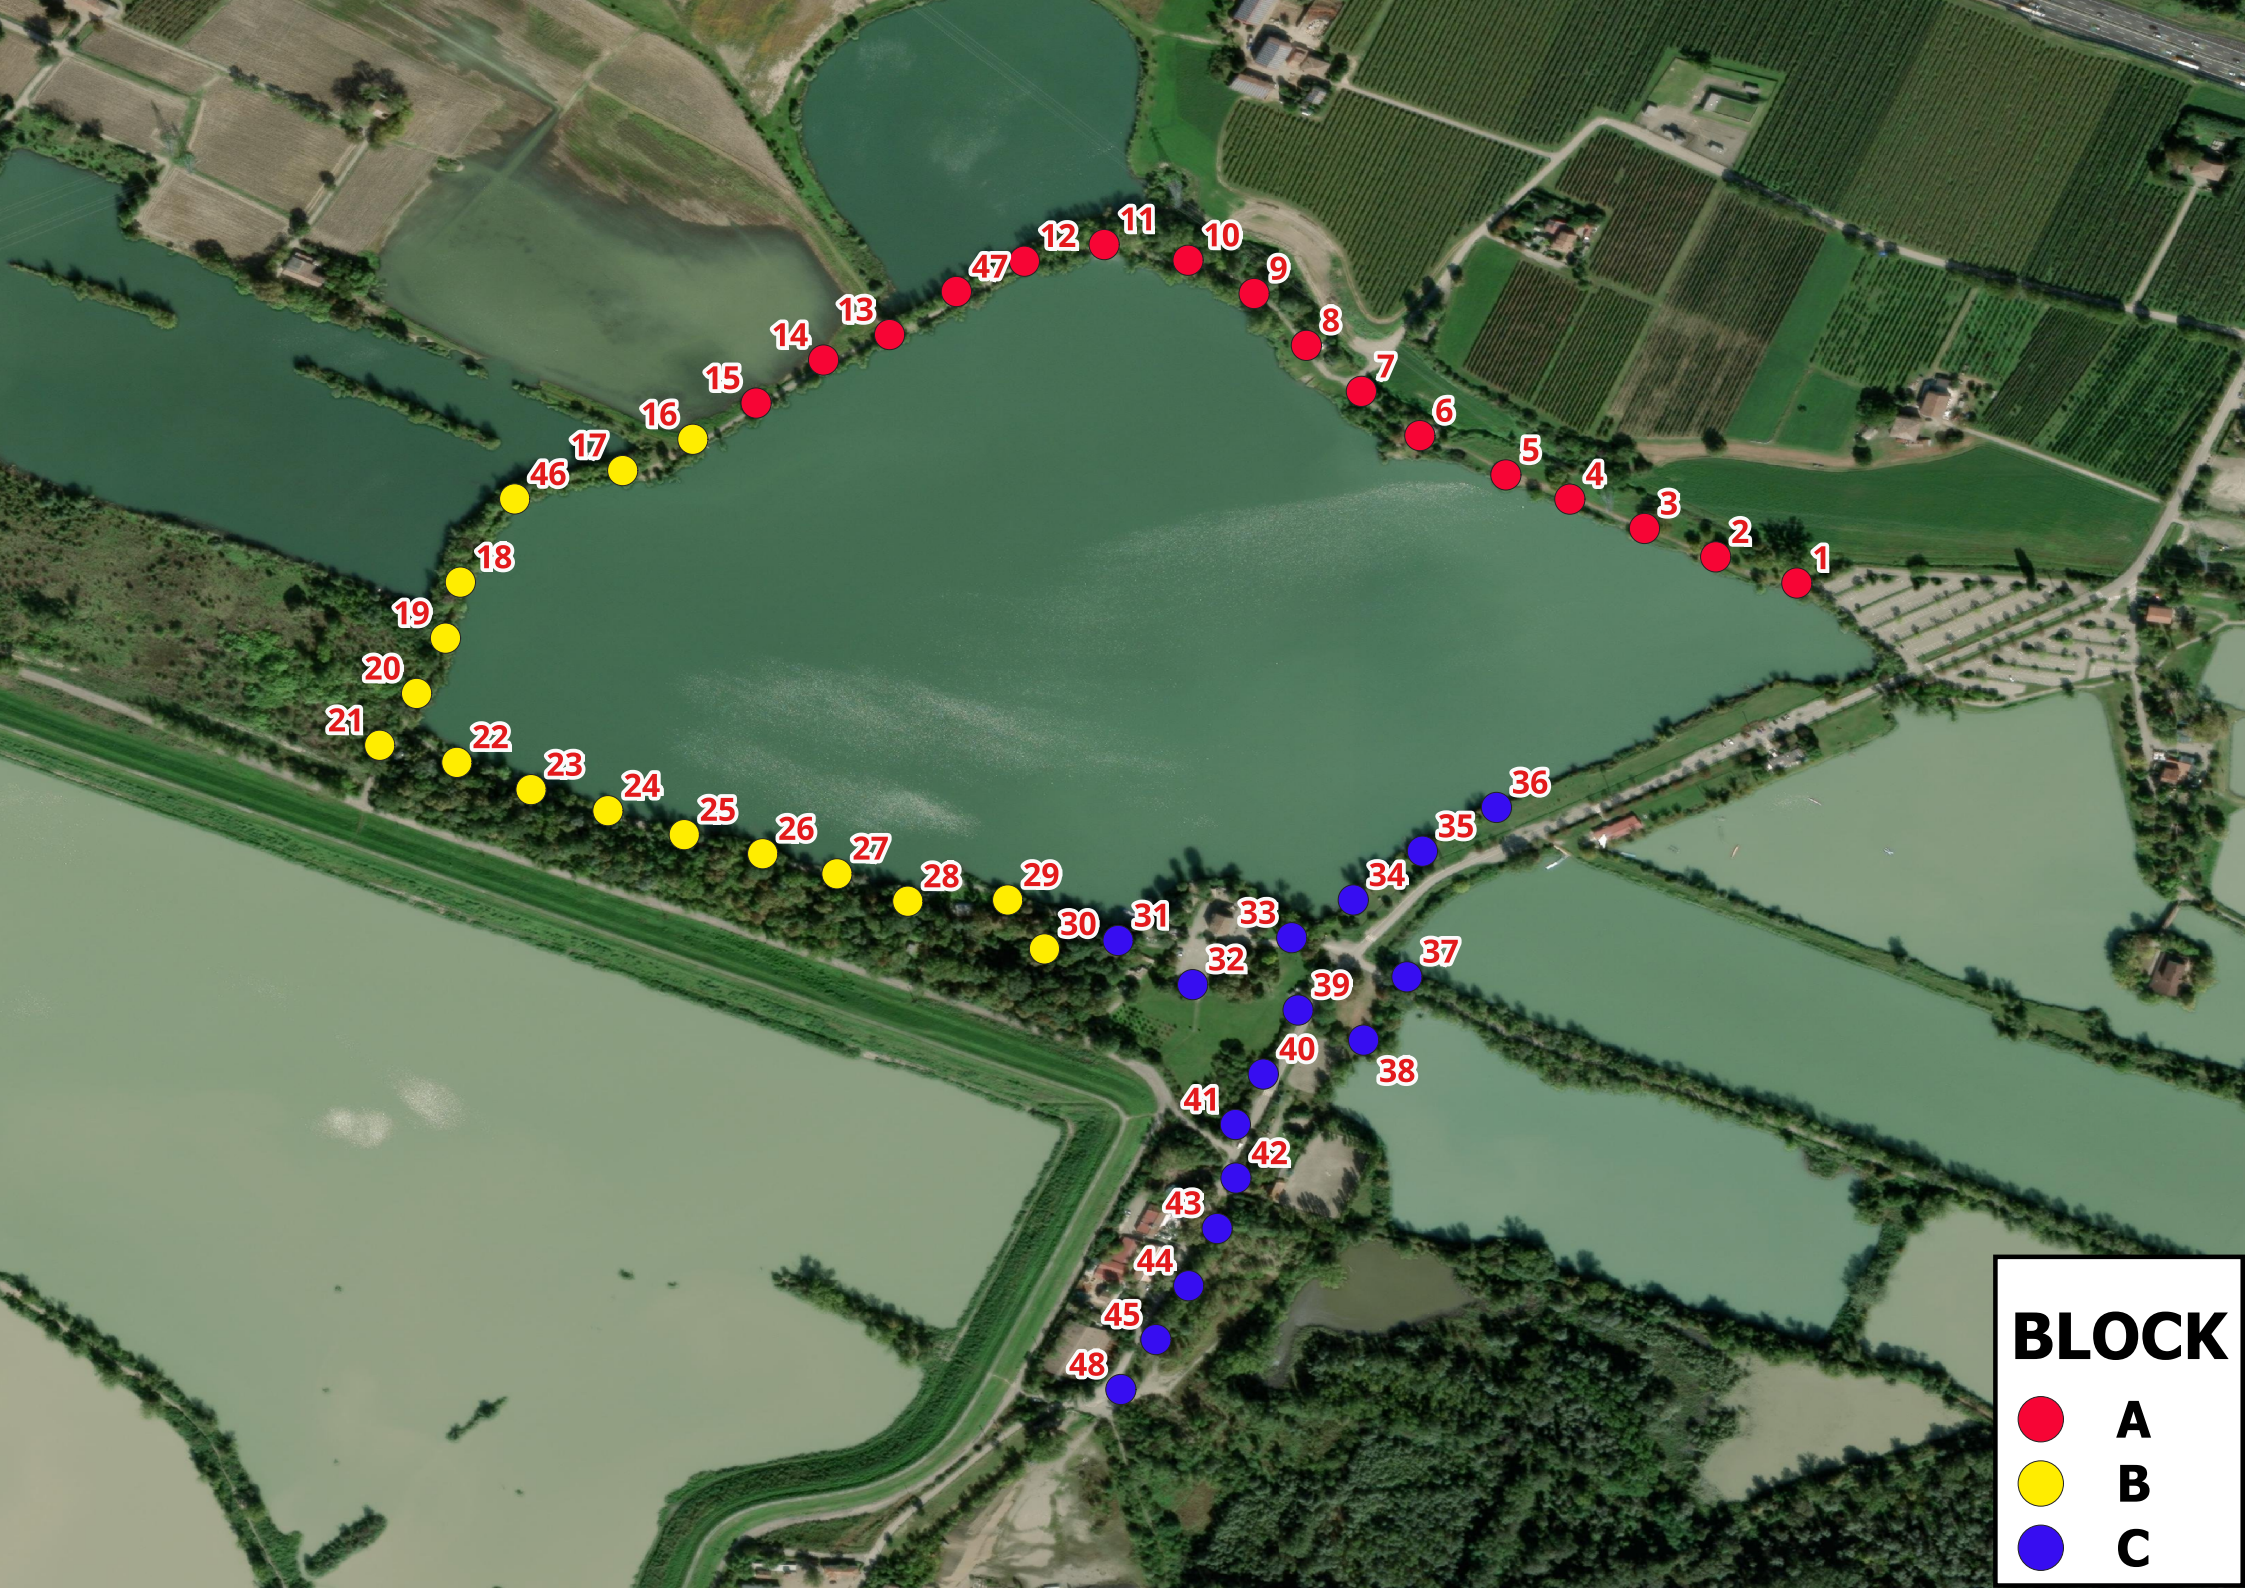

**BLOCK**

|                                                                                       |   |
|---------------------------------------------------------------------------------------|---|
|  | A |
|  | B |
|  | C |

Supplement: s1 [file study_area.pdf › study_area.pdf]
